# Supplementary material for: Quantifying Renin-Angiotensin-System Alterations in COVID-19
Source: MDPI journal article supplement (doi:10.3390/cells10102755), 2021-10-14
Supplement: s1 [file s1]

## Supplementary Material

### Quantifying Renin-Angiotensin-System Alterations in COVID-19

F. Pucci, F. Annoni, R.A. Santos, F.S. Taccone, M. Rومان

Table 1. Mean RAS peptide levels and enzymatic activities collected from different studies.

|               | Unit        | Severe           | Non-Severe       | Controls         | <i>p</i> -value | <i>N</i> | Method | Ref  |
|---------------|-------------|------------------|------------------|------------------|-----------------|----------|--------|------|
| ACE activity  | U/mL        | 49 [37–68]       | 64 [52–78]       | 75 [58–99]       | <0.001          | 196      | KPSM   | [1]  |
|               | U/mL        | 44 [32–53]       | 48 [36–55]       | 35 [25–51]       | 0.01            | 96       | ELISA  | [2]  |
|               | RFU/nL      | 0.22 [0.27–0.18] | 0.2 [0.3–0.16]   | 0.3 [0.35–0.24]  | -               | 33       | FA     | [3]  |
| ACE level     | ng/mL       | 57 [45–70]       |                  | 64 [48–265]      | -               | 124      | ELISA  | [4]  |
| ACE2 activity | RFU/nL      | 0.15 [0.2–0.09]  | 0.16 [0.2–0.11]  | 0.13 [0.16–0.1]  | -               | 33       | FA     | [3]  |
|               | pmol/min/mL | 11.2 [8.3–22]    | 5.4 [1.8–9.0]    | 0.06 [0.02–2.2]  | <0.0001         | 136      | FA     | [5]  |
| POP activity  | RFU/nL      | 0.09 [0.13–0.06] | 0.12 [0.07–0.17] | 0.08 [0.12–0.05] | -               | 33       | FA     | [3]  |
| ACE2 level    | ng/mL       | 8.5 [4.7–10.6]   |                  | 0.8 [0.7–1.0]    | <0.001          | 15       | LC-MS  | [6]  |
|               | ng/mL       | 2.1 [1.3–3.0]    | 1.3 [1.0–2.4]    | -                | -               | 153      | LC-MS  | [7]  |
|               | ng/mL       | 15.1 [9.8–32]    | 3.2 [1.8–4.7]    | -                | <0.001          | 153      | LC-MS  | [7]  |
|               | ng/mL       | 19.4 [±2]        |                  | 22.6 [±4]        | <0.05           | 45       | ELISA  | [8]  |
|               | ng/mL       | 5.0 [2.8–11.8]   |                  | 1.4 [1.1–1.6]    | <0.0001         | 124      | ELISA  | [4]  |
|               | NPX         | 1.5 [1.0–2.4]    | 1.1 [0.9–1.6]    |                  | <0.001          | 205      | PEA    | [9]  |
|               | NPX         | 4 [2.4–5.0]      | 1.8 [1.5–2.4]    |                  | <0.0001         | 205      | PEA    | [9]  |
|               | ng/mL       | 1.4 [0.7–3.5]    | 2.1 [0.6–22.4]   | 0.5 [0.1–1.9]    | 0.001           | 96       | ELISA  | [2]  |
|               | ng/mL       | 1.3 [±0.1]       | 1.5 [±0.1]       | -                | <0.01           | 85       | ELISA  | [10] |
|               | ng/mL       | 94 [46–300]      |                  | 43 [37–95]       | -               | 15       | LC-MS  | [6]  |
| AngI level    | ng/mL       | 31 [±6]          |                  | 41 [±] 10        | -               | 38       | LC-MS  | [11] |
|               | ng/mL       | 1.5 [1.3–2.0]    |                  | 3.3 [2.0–4.0]    | <0.005          | 45       | ELISA  | [8]  |
|               | ng/mL       | 0.4 [0.4–0.5]    | 1.0 [0.6–1.5]    | -                | 0.03            | 28       | ELISA  | [12] |
|               | pg/mL       | 42 [32–45]       | 39 [26–47]       | 37 [24–47]       | -               | 96       | ELISA  | [2]  |
|               | ng/mL       | 0.15 [0.1–0.22]  |                  | 0.7 [0.5–1.0]    | <0.001          | 41       | ELISA  | [13] |
| AngII level   | ng/mL       | 52 [30–78]       |                  | 137 [105–495]    | 0.008           | 15       | LC-MS  | [6]  |
|               | pmol/L      | 166 [61–680]     | 48 [16–131]      | -                | <0.01           | 153      | LC-MS  | [7]  |
|               | pmol/L      | 96 [38–250]      | 33 [9–78]        | -                | <0.01           | 153      | LC-MS  | [7]  |
|               | ng/mL       | 6.0 [±1.1]       |                  | 10.7 [±1.9]      | <0.05           | 38       | LC-MS  | [11] |
|               | ng/mL       | 1.0 [0.7–1.3]    |                  | 0.7 [0.4–1.1]    | <0.05           | 45       | ELISA  | [8]  |
|               | ng/mL       | 0.25 [0.2–0.3]   | 0.6 [0.25–0.9]   | -                | 0.04            | 28       | ELISA  | [12] |
|               | ng/mL       | 0.21 [0.13–0.42] |                  | 0.13 [0.08–0.17] | <0.01           | 27       | ELISA  | [14] |
|               | pg/mL       | 56 [23–131]      | 99 [65–153]      | 103 [71–140]     | -               | 94       | ELISA  | [2]  |
|               | ng/mL       | 0.15 [0.13–0.17] | 0.13 [0.12–0.16] | -                | <0.01           | 55       | ELISA  | [15] |
|               | ng/mL       | 0.4 [0.2–3.0]    |                  | 0.8 [0.3–4.8]    | <0.001          | 112      | ELISA  | [16] |
|               | ng/mL       | 4.8 [4.4–5.2]    |                  | 4.4 [4.2–4.6]    | <0.01           | 85       | ELISA  | [10] |
| Ang1–7 level  | pmol/L      | 25 [14–35]       | 18 [11–25]       | 17 [8–25]        | -               | 33       | RIA    | [3]  |
|               | ng/mL       | 24 [5.4–40]      |                  | 2.0 [2.0–3.3]    | 0.004           | 15       | LC-MS  | [6]  |
|               | pmol/L      | 11 [5–51]        | 1.5 [1.5–5.0]    | -                | <0.001          | 153      | LC-MS  | [7]  |
|               | pmol/L      | 50 [15–132]      | 1.5 [1.5–3.7]    | -                | <0.001          | 153      | LC-MS  | [7]  |
|               | ng/mL       | 14 [±2.3]        |                  | 7.5 [±1.4]       | <0.05           | 38       | LC-MS  | [11] |
|               | ng/mL       | 0.5 [0.4–0.7]    |                  | 0.5 [0.4–0.6]    | -               | 45       | ELISA  | [8]  |
|               | ng/mL       | 0.2 [0.2–0.3]    | 0.3 [0.2–0.4]    | -                | 0.04            | 28       | ELISA  | [12] |
|               | pg/mL       | 14.3 [1.6–33]    | 8.4 [2.8–28]     | 0.98 [0.98–3.7]  | <0.001          | 96       | ELISA  | [2]  |
|               | ng/mL       | 0.17 [0.13–0.27] |                  | 0.32 [0.22–0.37] | 0.003           | 41       | ELISA  | [13] |
|               | pmol/L      | 15 [0–60]        | 17 [0–70]        | 10 [5–15]        | -               | 33       | RIA    | [3]  |
| Ang1–5 level  | ng/mL       | 9.0 [5.7–14]     |                  | 4.3 [2.6–14]     | -               | 15       | LC-MS  | [6]  |
|               | ng/mL       | 3.4 [±0.8]       |                  | 19.3 [±6.3]      | <0.01           | 38       | LC-MS  | [11] |

The values for three classes of individuals (severe COVID-19, non-severe COVID-19 and controls) or two classes (COVID-19 and controls) are reported. *N* is the number of samples on which the experimental measures have been done. The different experimental methods used in the measurements of the peptide levels are: liquid chromatography-mass spectrometry (LC-MS), enzyme-linked immunosorbent assay (ELISA), kinetic spectrophotometry (KPSM), fluorescence assay

(FA), radioimmunoassay (RIA) and proximity extension assay (PEA). Only the *p*-values reported by the authors to be statistically significant (<0.05) are shown.

## References

1. Zhu, Z.; Cai, T.; Fan, L.; Lou, K.; Hua, X.; Huang, Z.; Gao, G. The potential role of serum angiotensin-converting enzyme in coronavirus disease 2019. *BMC Infect. Dis.* **2020**, *20*, 883.
2. Burns, K.; Cheng, M.; Lee, T.; McGeer, A.; Sweet, D.; Tran, K.; Lee, T.; Murthy, S.; Boyd, J.; Singer, J.; et al. Sustained dysregulation of the plasma renin–angiotensin system in acute COVID-19. *Research Square* **2021**, in preprint.
3. Files, D.C.; Gibbs, K.W.; Schaich, C.L.; Collins, S.P.; Gwathmey, T.M.; Casey, J.D.; Self, W.H.; Chappell, M.C. A Pilot Study to Assess the Circulating Renin-Angiotensin-System in COVID-19 Acute Respiratory Failure. *Am. J. Physiol. Cell. Mol. Physiol.* **2021**, *321*, L213–L218, doi:10.1152/ajplung.00129.2021.
4. Lundström, A.; Ziegler, L.; Havervall, S.; Rudberg, A.S.; von Meijenföldt, F.; Lisman, T.; Mackman, N.; Sandén, P.; Thålin, C. Soluble angiotensin-converting enzyme 2 is transiently elevated in COVID-19 and correlates with specific inflammatory and endothelial markers. *J. Med. Virol.* **2021**, *93*, 5908–5916.
5. Patel, S. K.; Juno, J. A.; Lee, W. S.; Wragg, K. M.; Hogarth, P. M.; Kent, S. J.; Burrell, L. M. Plasma ACE2 activity is persistently elevated following SARS-CoV-2 infection: implications for COVID-19 pathogenesis and consequences. *Eur. Respir. J.* **2021**, *57*, 2003730.
6. van Lier, D.; Kox, M.; Santos, K.; van der Hoeven, H.; Pillay, J.; Pickkers, P. Increased blood angiotensin converting enzyme 2 activity in critically ill COVID-19 patients. *ERJ. Open Res.* **2021**, *7*, 00848–02020.
7. Reindl-Schwaighofer, R.; Hoßlmoser, S.; Eskandary, F.; Poglitsch, M.; Bonderman, D.; Strassl, R.; Aberle, J. H.; Oberbauer, R.; Zoufaly, A.; Hecking, M. ACE2 elevation in severe COVID-19. *Am J Respir. Crit. Care Med.* **2021**, *203*, 1191–1196.
8. Osman, I.O.; Melenotte, C.; Brouqui, P.; Million, M.; Lagier, J.-C.; Parola, P.; Stein, A.; La Scola, B.; Meddeb, L.; Mege, J.-L.; et al. Expression of ACE2, Soluble ACE2, Angiotensin I, Angiotensin II and Angiotensin-(1-7) Is Modulated in COVID-19 Patients. *Front. Immunol.* **2021**, *12*, 625732, doi:10.3389/fimmu.2021.625732.
9. Kragstrup, T.W.; Singh, H.S.; Grundberg, I.; Nielsen, A.L.-L.; Rivellese, F.; Mehta, A.; Goldberg, M.B.; Filbin, M.R.; Qvist, P.; Bibby, B.M. Plasma ACE2 predicts outcome of COVID-19 in hospitalized patients. *PLoS. ONE.* **2021**, *16*, e0252799, doi:10.1371/journal.pone.0252799.
10. Rieder, M.; Wirth, L.; Pollmeier, L.; Jeserich, M.; Goller, I.; Baldus, N.; Schmid, B.; Busch, H.-J.; Hofmann, M.; Kern, W.; et al. Serum ACE2, Angiotensin II, and Aldosterone Levels Are Unchanged in Patients With COVID-19. *Am. J. Hypertens.* **2021**, *34*, 278–281, doi:10.1093/ajh/hpaa169.
11. Martins, A. L. V.; da Silva, F. A.; Bolais-Ramos, L.; de Oliveira, G. C.; Ribeiro, R. C.; Pereira, D. A. A.; D., Annoni, F.; Diniz, M. M. L.; Silva, T. G. F.; Increased circulating levels of angiotensin-(1-7) in severely ill COVID-19 patients. *ERJ. Open. Res.* **2021**, *7*, 00114–02021.
12. Eleuteri, D.; Montini, L.; Cutuli, S. L.; Rossi, C.; Alcaro, F.; Antonelli, M. Renin–angiotensin system dysregulation in critically ill patients with acute respiratory distress syndrome due to COVID-19: a preliminary report. *Critical Care* **2021**, *25*, 91.
13. Henry, B.M.; Benoit, J.L.; Berger, B.A.; Pulvino, C.; Lavie, C.J.; Lippi, G.; Benoit, S.W. Coronavirus disease 2019 is associated with low circulating plasma levels of angiotensin 1 and angiotensin 1,7. *J. Med. Virol.* **2021**, *93*, 678–680, doi:10.1002/jmv.26479.
14. Wu, Z.; Hu, R.; Zhang, C.; Ren, W.; Yu, A.; Zhou, X. Elevation of plasma angiotensin II level is a potential pathogenesis for the critically ill COVID-19 patients. *Crit. Care* **2020**, *24*, 1–3, doi:10.1186/s13054-020-03015-0.
15. Liu, N.; Hong, Y.; Chen, R.-G.; Zhu, H.-M. High rate of increased level of plasma angiotensin II and its gender difference in COVID-19: an analysis of 55 hospitalized patients with COVID-19 in a single hospital, Wuhan, China. *medRxiv* **2020**, in preprint..
16. Ozkan, S.; Cakmak, F.; Konukoglu, D.; Biberoglu, S.; Ipekci, A.; Akdeniz, Y.S.; Bolayirli, I.M.; Balkan, I.I.; Dumanli, G.Y.; Ikizceli, I. Efficacy of Serum Angiotensin II Levels in Prognosis of Patients With Coronavirus Disease 2019. *Crit. Care Med.* **2021**, *49*, e613–e623, doi:10.1097/ccm.0000000000004967.
